# Supplementary material
Source: PubMed Central journal article supplement (PMC2034229)

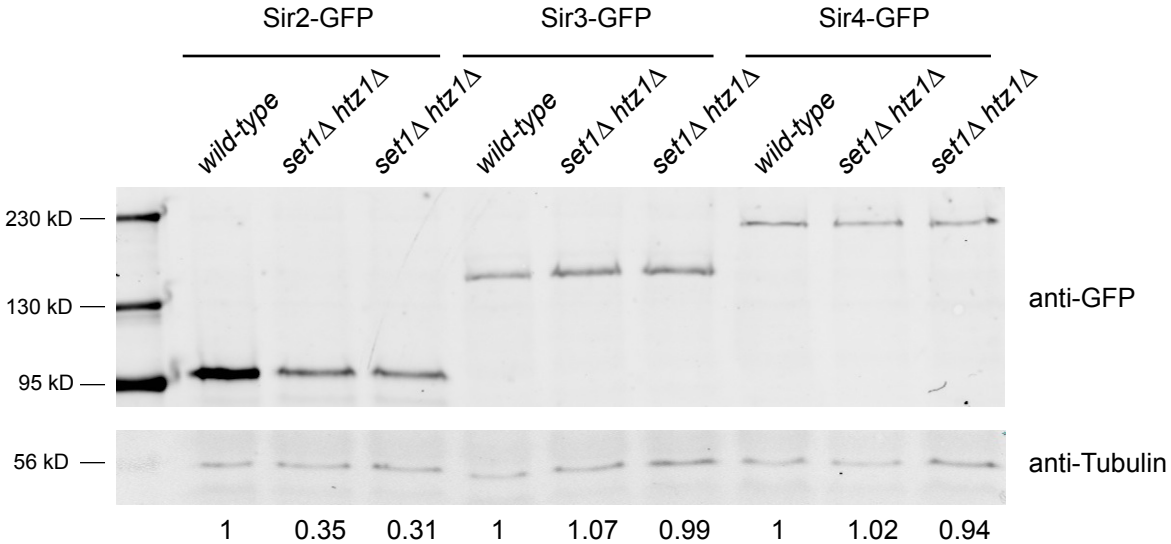

Supplement: pnas_0700914104_6.pdf [file pnas_0700914104_6.pdf]
